# Supplementary figures and images for: TGR5 Activation Modulates an Inhibitory Effect on Liver Fibrosis Development Mediated by Anagliptin in Diabetic Rats
Source: MDPI journal article supplement (doi:10.3390/cells8101153), 2019-09-26

## Supplementary Figure 2

**A**

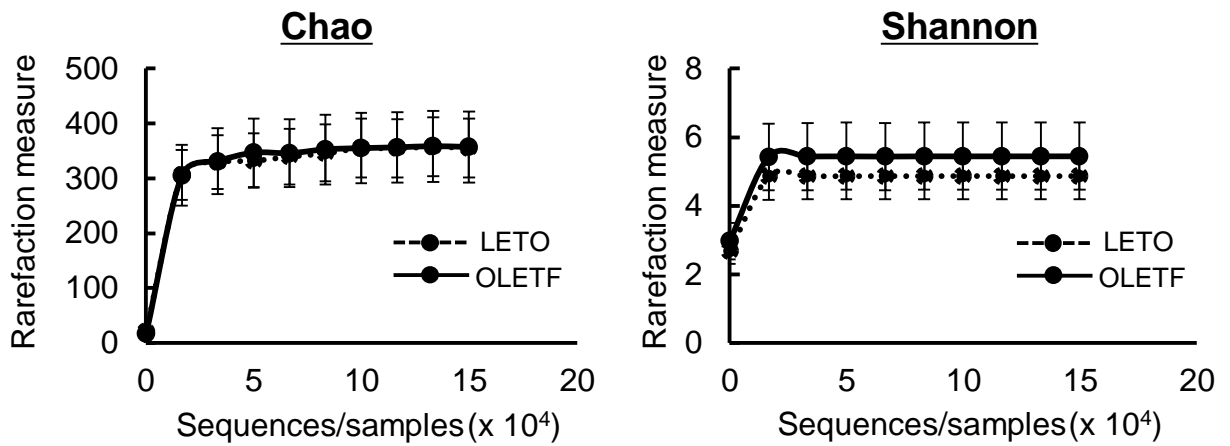

**B**

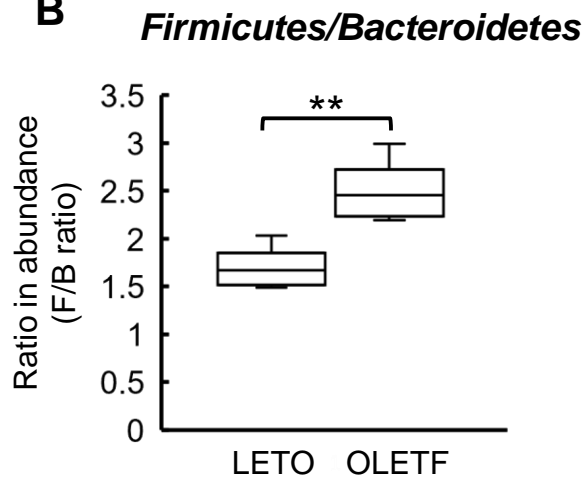

Supplement: s1 [file s1]

**Supplementary Figure 1**

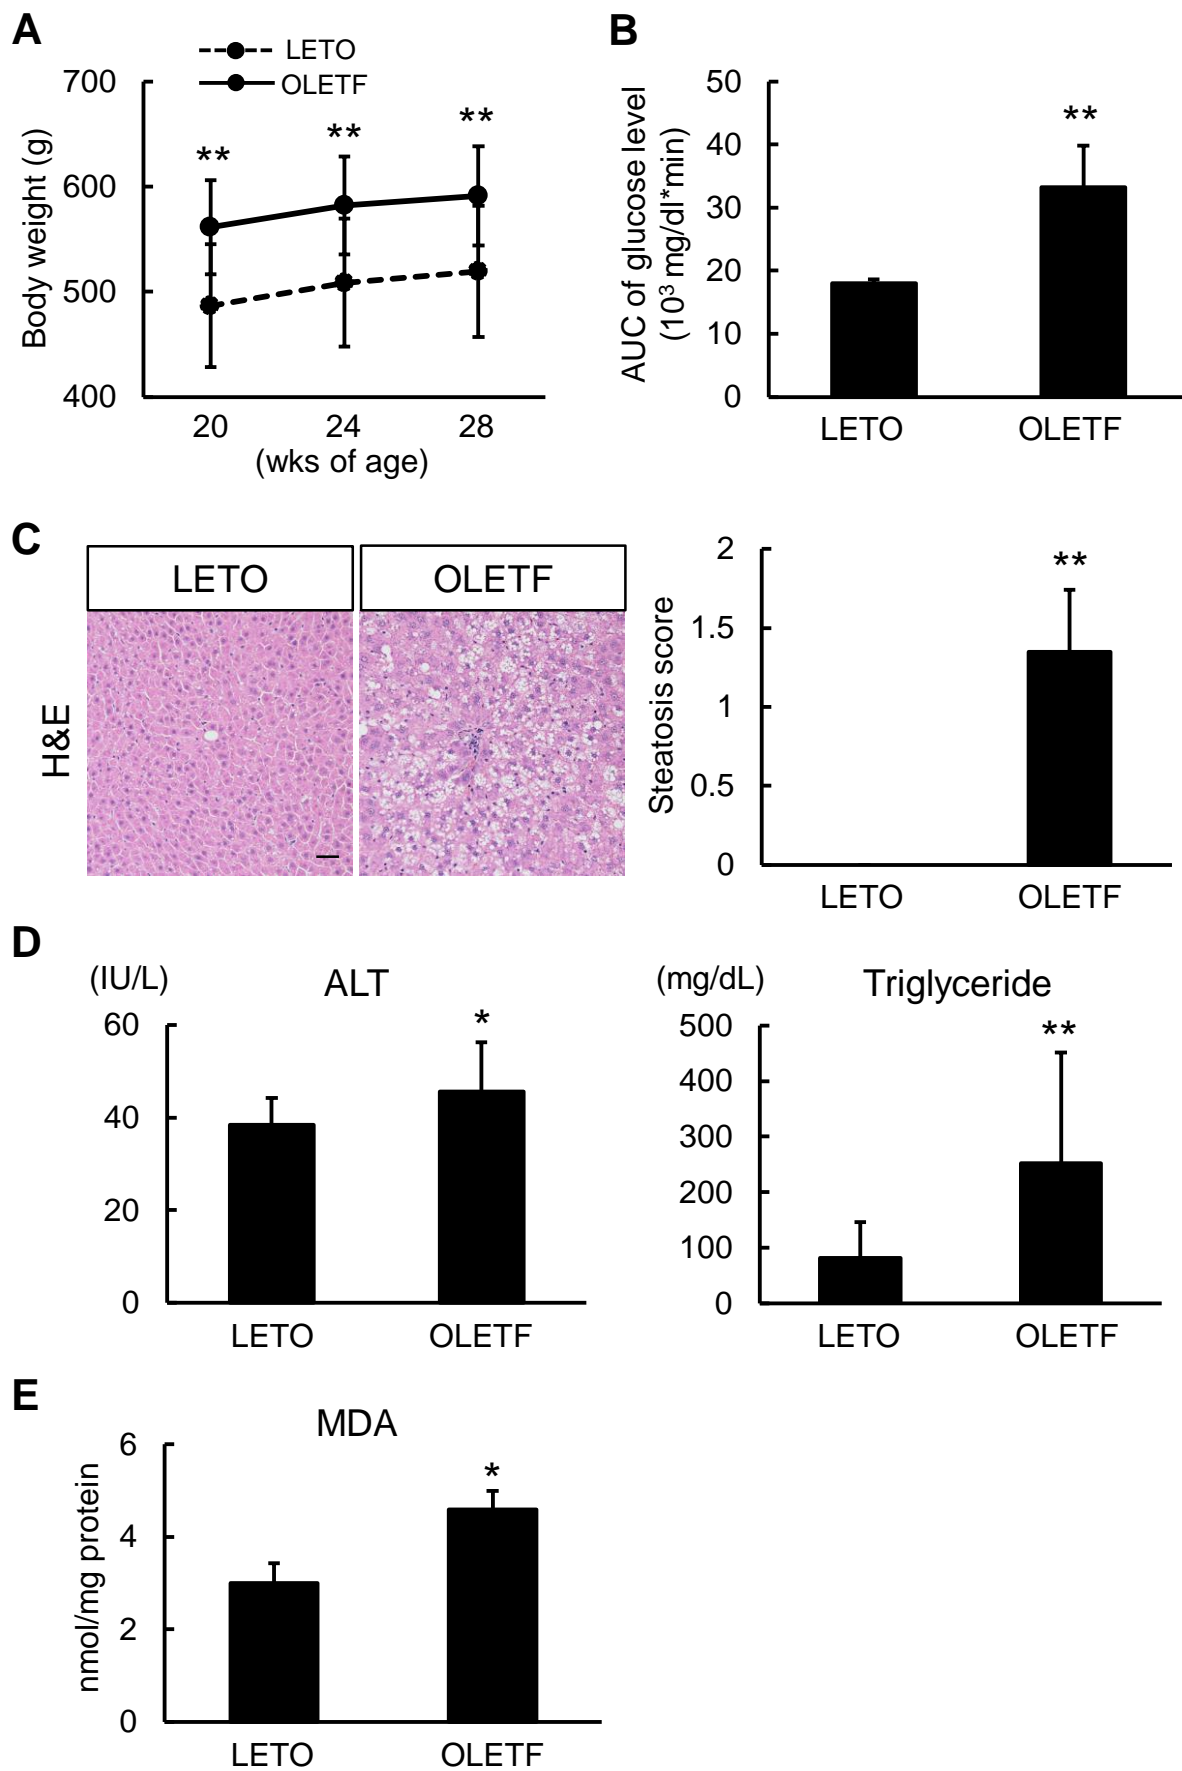

Supplement: s1 [file s1]
